# Supplementary material for: Authorship inequalities in global health research: the IeDEA Southern Africa collaboration
Source: PubMed Central journal article supplement (PMC10729048; doi:10.1136/bmjgh-2023-013316), 2023-12-15
Supplement: bmjgh-2023-013316supp001.pdf [file bmjgh-2023-013316supp001.pdf]

## Supplement

### Skrivankova et al. Authorship Inequalities in Global Health Research: the leDEA Southern Africa Collaboration

|                                                                                                                                                                                                                                                                                                    |    |
|----------------------------------------------------------------------------------------------------------------------------------------------------------------------------------------------------------------------------------------------------------------------------------------------------|----|
| Table 1: List of PMIDs and DOIs for all 313 articles used in the main analysis.....                                                                                                                                                                                                                | 2  |
| Table 2. Number of authorships by journal, in alphabetical order.....                                                                                                                                                                                                                              | 4  |
| Table 3. Time trends: interaction between year and gender. ....                                                                                                                                                                                                                                    | 5  |
| Table 4. Characteristics of authors and authorships of 157 (regional, original research) articles published by the International epidemiology Databases to Evaluate AIDS (leDEA) in Southern Africa, 2007 to 2020. ....                                                                            | 6  |
| Table 5. Associations of gender and country of affiliation with authorship position on 157 (regional, original research) articles published by the International epidemiology Databases to Evaluate AIDS (leDEA) in Southern Africa, 2007 to 2020. ....                                            | 7  |
| Figure 1. Proportion of Women authorships across the range of standardised authorship positions, with a weighted linear regression line (upper panel) and proportion of authorships by country income level with weighted cubic splines (lower panel). ....                                        | 8  |
| Table 6. Characteristics of authors and authorships of 95 multiregional, original research articles including the International epidemiology Databases to Evaluate AIDS (leDEA), 2007 to 2020, with participation of the Southern African region.....                                              | 9  |
| Table 7. Associations of gender and country of affiliation with authorship position on 95 multiregional, original research articles including the International epidemiology Databases to Evaluate AIDS (leDEA), 2007 to 2020, with participation of the Southern African region. ....             | 10 |
| Figure 2. Proportion of Women authorships across the range of standardised authorship position, with a weighted linear regression line (upper panel) and proportion of authorships by country income level with weighted cubic splines (lower panel). ....                                         | 11 |
| Table 8. Characteristics of authors and authorships of 61 other publications (methods papers, commentaries, systematic reviews) acknowledging the grant of the International epidemiology Databases to Evaluate AIDS (leDEA) in Southern Africa, 2007 to 2020.....                                 | 12 |
| Table 9. Associations of gender and country of affiliation with authorship position on 61 other publications (methods papers, commentaries, systematic reviews) acknowledging the grant of the International epidemiology Databases to Evaluate AIDS (leDEA) in Southern Africa, 2007 to 2020. ... | 13 |
| Figure 3. Proportion of Women authorships across the range of standardised authorship position, with a weighted linear regression line (upper panel) and proportion of authorships by country income level with weighted cubic splines (lower panel). ....                                         | 14 |

**Table 1: List of PMIDs and DOIs for all 313 articles used in the main analysis.**

| PMID     | DOI                              | PMID     | DOI                            | PMID     | DOI                             |
|----------|----------------------------------|----------|--------------------------------|----------|---------------------------------|
| 17460471 | 10.1097/QAI.0b013e318042e1c3     | 23827024 | 10.5588/ijtld.13.0032          | 28657963 | 10.1097/QAD.0000000000001499    |
| 17990236 | 10.1086/522986                   | 23846570 | 10.1097/QAI.0b013e3182a23e9a   | 28691434 | 10.7448/IAS.20.1.21552          |
| 17998240 | 10.1093/ije/dym216               | 23860481 | 10.1097/INF.0b013e31828c3738   | 28691438 | 10.7448/IAS.20.1.21327          |
| 18240981 | 10.1089/jwh.2007.0353            | 23873614 | 10.1002/sim.5912               | 28708808 | 10.1097/QAI.0000000000001499    |
| 18373510 | 10.1111/j.1365-3156.2008.02078.x | 23874476 | 10.1371/journal.pone.0067956   | 28792285 | 10.1080/16549716.2017.1359923   |
| 18468529 | 10.1016/S0140-6736(08)60669-8    | 23931924 | 10.1016/S0140-6736(13)61713-4  | 28865422 | 10.1186/s12885-017-3549-1       |
| 18613745 | 10.1371/journal.pmed.0050148     | 24114324 | 10.1002/14651858.CD010309.pub2 | 28884524 | 10.7448/IAS.20.1.21947          |
| 18670668 | 10.2471/blt.07.044248            | 24147059 | 10.1371/journal.pone.0077697   | 28953328 | 10.7448/IAS.20.1.21902          |
| 18771599 | 10.1186/1471-2431-8-34           | 24180002 | 10.1097/qad.0b013e328360ddb4   | 29022531 | 10.7196/SAMJ.2017.v107i10.12362 |
| 18797643 | 10.2471/blt.07.045294            | 24260029 | 10.1371/journal.pmed.1001555   | 29112692 | 10.1371/journal.pmed.1002407    |
| 18981768 | 10.1097/QAD.0b013e3283121ca9     | 24267671 | 10.7448/IAS.16.1.18616         | 29143625 | 10.1186/s12879-017-2768-z       |
| 19053892 | 10.1586/14787210.6.6.785         | 24296645 | 10.3851/IMP2710                | 29175231 | 10.1016/j.jcv.2017.11.005       |
| 19142294 | 10.2471/blt.07.049908            | 24326599 | 10.1097/QAI.0000000000000075   | 29206723 | 10.1097/QAI.0000000000001611    |
| 19287300 | 10.1097/QAD.0b013e32832956ad     | 24363808 | 10.1371/journal.pone.0081037   | 29232366 | 10.1371/journal.pmed.1002468    |
| 19399157 | 10.1371/journal.pmed.1000066     | 24378936 | 10.1097/INF.000000000000214    | 29330173 | 10.1136/bmjopen-2017-017405     |
| 19413745 | 10.1111/j.1365-3156.2009.02290.x | 24378944 | 10.1097/INF.0000000000000222   | 29336004 | 10.1007/s10461-018-2030-8       |
| 19531928 | 10.1097/QAD.0b013e32832e05b2     | 24468999 | 10.1097/QAD.000000000000143    | 29432229 | 10.1097/COH.0000000000000457    |
| 19624478 | 10.1111/j.1365-3156.2009.02338.x | 24521144 | 10.1186/2046-4053-3-11         | 29461329 | 10.1097/COH.0000000000000460    |
| 19673616 | 10.1086/605501                   | 24585558 | 10.1093/cid/ciu117             | 29479867 | 10.1002/jia2.25084              |
| 19848608 | 10.1086/648096                   | 24610874 | 10.1093/infdis/jiu138          | 29508740 | 10.1016/S0140-6736(18)30463-X   |
| 19859538 | 10.1371/journal.pmed.1000173     | 24691205 | 10.1097/QAD.0000000000000135   | 29509590 | 10.1097/QAI.0000000000001667    |
| 20001527 | 10.1086/649007                   | 24729433 | 10.1002/jic.28894              | 29514233 | 10.1093/cid/cix1140             |
| 20003034 | 10.1111/j.1365-3156.2009.02445.x | 24804707 | 10.1371/journal.pone.0096334   | 29517500 | 10.1097/COH.0000000000000461    |
| 20035163 | 10.1097/QAI.0b013e3181c22d19     | 24866364 | 10.1371/journal.pmed.1001650   | 29528851 | 10.1097/COH.0000000000000448    |
| 20334848 | 10.1016/S1473-3099(10)70026-8    | 24977471 | 10.1097/QAI.0000000000000269   | 29570723 | 10.1371/journal.pmed.1002534    |
| 20473792 | 10.1080/09540120903349102        | 25039469 | 10.1111/tmi.12352              | 29603887 | 10.1002/jia2.25101              |
| 20507549 | 10.1186/1471-2334-10-138         | 25117964 | 10.1097/QAI.0000000000000253   | 29682776 | 10.1002/sim.7654                |
| 20561308 | 10.1111/j.1365-3156.2010.02561.x | 25196841 | 10.1002/jic.29183              | 29727458 | 10.1371/journal.pmed.1002565    |
| 20588185 | 10.1097/QAI.0b013e3181e0c4cf     | 25203931 | 10.1371/journal.pmed.1001718   | 29767681 | 10.1093/aje/kwy093              |
| 20638120 | 10.1016/S0140-6736(10)60666-6    | 25265135 | 10.1097/EDE.0000000000000178   | 29874247 | 10.1371/journal.pone.0197854    |
| 20683318 | 10.1097/QAD.0b013e32833d45c5     | 25299866 | 10.5588/ijtld.14.0106          | 29881504 | 10.11604/pamj.2017.28.261.11300 |
| 20935554 | 10.1097/QAD.0b013e32833fb71f     | 25321185 | 10.1097/QAI.0000000000000399   | 29889240 | 10.1093/cid/ciy347              |
| 21085709 | 10.1371/journal.pone.0013899     | 25362193 | 10.1093/infdis/jiu601          | 29912371 | 10.1093/cid/ciy304              |
| 21106512 | 10.1136/sti.2010.044255          | 25392857 | 10.1097/qad.0000000000000446   | 29956882 | 10.1002/jia2.25149              |
| 21107266 | 10.1097/QAI.0b013e3182060610     | 25393941 | 10.1097/QAI.0000000000000360   | 29972632 | 10.1002/jia2.25157              |
| 21109173 | 10.1016/S1473-3099(10)70280-2    | 25399412 | 10.1093/aje/kwu295             | 29991395 | 10.5588/ijtld.17.0766           |
| 21152392 | 10.1371/journal.pone.0014149     | 25501345 | 10.1097/QAI.0000000000000380   | 29994916 | 10.1097/QAI.0000000000001745    |
| 21267057 | 10.1371/journal.pmed.1000390     | 25516092 | 10.7448/IAS.17.1.19045         | 30005013 | 10.1097/QAD.0000000000001942    |
| 21272350 | 10.1186/1471-2334-11-31          | 25562494 | 10.1097/QAD.0000000000000506   | 30019488 | 10.1002/hep.30183               |
| 21317578 | 10.1097/QAI.0b013e318202c40e     | 25701987 | 10.1016/S2214-109X(14)70383-3  | 30063542 | 10.1097/EDE.0000000000000905    |
| 21418449 | 10.1111/j.1365-3156.2011.02767.x | 25793531 | 10.1371/journal.pone.0119299   | 30215763 | 10.1093/jpids/piy087            |
| 21436714 | 10.1097/QAI.0b013e3182199ee9     | 25859596 | 10.1093/ije/dyu271             | 30308013 | 10.1371/journal.pone.0205455    |
| 21593078 | 10.1093/ije/dyr080               | 25884599 | 10.1186/s12885-015-1171-7      | 30452634 | 10.1093/cid/ciy960              |
| 21681057 | 10.1097/QAD.0b013e328349822f     | 25950205 | 10.1097/QAI.0000000000000669   | 30531296 | 10.1097/QAI.0000000000001923    |
| 21756512 | 10.5588/ijtld.10.0249            | 26112433 | 10.1016/j.jclinepi.2015.04.002 | 30548817 | 10.1002/jia2.25215              |
| 21834797 | 10.1111/j.1365-3156.2011.02854.x | 26167620 | 10.1097/QAI.0000000000000683   | 30549445 | 10.1002/jia2.25202              |
| 21935448 | 10.1371/journal.pone.0024737     | 26175054 | 10.1002/jic.29687              | 30614622 | 10.1002/jia2.25200              |
| 21957868 | 10.1186/1471-2334-11-258         | 26192393 | 10.1097/INF.0000000000000801   | 30657644 | 10.1002/jia2.25218              |
| 21969875 | 10.1371/journal.pone.0025244     | 26214336 | 10.1097/EDE.0000000000000334   | 30681241 | 10.1111/tmi.13209               |
| 22016763 | 10.1371/journal.pone.0025098     | 26218412 | 10.1097/QAI.0000000000000773   | 30718257 | 10.1128/AAC.02175-18            |
| 22039357 | 10.1371/journal.pmed.1001111     | 26288079 | 10.1371/journal.pone.0135179   | 30744962 | 10.1016/S1473-3099(18)30673-X   |
| 22067665 | 10.1097/QAI.0b013e31823edb6a     | 26356987 | 10.1016/j.jcv.2015.08.019      | 30882732 | 10.1097/INF.0000000000002156    |
| 22089376 | 10.1097/QAD.0b013e32834e1b5f     | 26375465 | 10.1097/QAI.0000000000000691   | 30891866 | 10.1111/tmi.13233               |
| 22095194 | 10.1097/QAD.0b013e32834ed814     | 26379169 | 10.1097/INF.0000000000000912   | 30950882 | 10.1097/QAD.0000000000002221    |
| 22103326 | 10.1111/j.1468-1293.2011.00947.x | 26407355 | 10.1093/jpids/piu020           | 31148372 | 10.1002/jia2.25304              |
| 22114687 | 10.1371/journal.pone.0027763     | 26411694 | 10.7448/IAS.18.1.20240         | 31181056 | 10.1371/journal.pmed.1002822    |
| 22116153 | 10.1128/JCM.05392-11             | 26423252 | 10.1016/S2352-3018(15)00087-9  | 31215037 | 10.1002/jic.32260               |

|          |                                  |          |                               |          |                                |
|----------|----------------------------------|----------|-------------------------------|----------|--------------------------------|
| 22205933 | 10.1371/journal.pone.0027919     | 26423550 | 10.1016/S2352-3018(15)00113-7 | 31233494 | 10.1371/journal.pcbi.1007083   |
| 22289654 | 10.1186/1758-2652-15-5           | 26470034 | 10.1097/QAI.0000000000000748  | 31242142 | 10.1097/QAI.0000000000002060   |
| 22421243 | 10.1097/QAD.0b013e3283536988     | 26479876 | 10.1097/EDE.0000000000000412  | 31332437 | 10.1093/infdis/jiz362          |
| 22433846 | 10.1097/QAI.0b013e3182557785     | 26685125 | 10.7448/IAS.18.1.20628        | 31436859 | 10.1002/sim.8340               |
| 22470121 | 10.1128/AAC.06460-11             | 26691682 | 10.1097/QAD.0000000000001009  | 31507083 | 10.1002/jia2.25392             |
| 22479556 | 10.1371/journal.pone.0034186     | 26700300 | 10.1136/jech-2015-206629      | 31613956 | 10.1093/infdis/jiz450          |
| 22668950 | 10.7196/samj.5625                | 26741583 | 10.1097/INF.0000000000000926  | 31623428 | 10.1002/jia2.25331             |
| 22695302 | 10.1097/QAD.0b013e3283565dd1     | 26852390 | 10.1186/s12885-016-2080-0     | 31682261 | 10.1093/infdis/jiz547          |
| 22742573 | 10.1186/1471-2334-12-147         | 26906162 | 10.1097/INF.0000000000001117  | 31698524 | 10.1111/tmi.13334              |
| 22743595 | 10.1097/QAI.0b013e3182632540     | 26939736 | 10.1016/S2352-3018(16)00016-3 | 31702088 | 10.1002/jia2.25412             |
| 22762421 | 10.5588/ijtld.12.0364            | 26945749 | 10.1186/s13104-016-1943-4     | 31725119 | 10.1097/INF.0000000000002516   |
| 22768066 | 10.1371/journal.pone.0039246     | 26972514 | 10.1016/j.epidem.2015.10.001  | 31725750 | 10.1371/journal.pone.0224837   |
| 22808948 | 10.1111/j.1365-3156.2012.03041.x | 27032097 | 10.1371/journal.pone.0152043  | 31800405 | 10.1097/QAD.0000000000002358   |
| 22845473 | 10.1586/erm.12.52                | 27036993 | 10.1016/S2352-3018(16)00008-4 | 31805028 | 10.1097/QAD.0000000000002357   |
| 22874482 | 10.1097/QAD.0b013e3283565e3e     | 27049853 | 10.1371/journal.pone.0151762  | 31814312 | 10.1002/jia2.25423             |
| 22879816 | 10.1371/journal.pmed.1001281     | 27062038 | 10.1002/jic.30129             | 31900473 | 10.1093/cid/ciz1224            |
| 22948267 | 10.1097/QAD.0b013e328359ab0c     | 27064254 | 10.1038/ng.3548               | 31997583 | 10.1002/jia2.25441             |
| 22973181 | 10.1371/journal.pmed.1001304     | 27073928 | 10.1371/journal.pone.0153243  | 32003159 | 10.1002/jia2.25447             |
| 22974345 | 10.1111/j.1365-3156.2012.03073.x | 27098265 | 10.1002/jic.30154             | 32032304 | 10.1097/QAI.0000000000002313   |
| 22987878 | 10.1542/peds.2011-3020           | 27254748 | 10.1097/COH.0000000000000298  | 32119663 | 10.1371/journal.pone.0228601   |
| 22994151 | 10.1111/j.1365-3156.2012.03089.x | 27282427 | 10.1007/s40264-016-0434-9     | 32219384 | 10.1093/aje/kwaa049            |
| 23172344 | 10.1136/sextrans-2012-050658     | 27293220 | 10.7448/IAS.19.1.20711        | 32357149 | 10.1371/journal.pone.0220165   |
| 23187940 | 10.1097/QAI.0b013e31827b70bf     | 27342220 | 10.1093/ije/dyw097            | 32406983 | 10.1002/jia2.25476             |
| 23199369 | 10.1111/tmi.12026                | 27428744 | 10.1097/QAD.0000000000001197  | 32414825 | 10.1136/bmjopen-2019-035246    |
| 23252488 | 10.2217/fmb.12.128               | 27461920 | 10.1093/cid/ciw500            | 32433224 | 10.1097/INF.0000000000002680   |
| 23300635 | 10.1371/journal.pone.0052297     | 27499385 | 10.1111/tmi.12764             | 32448379 | 10.1186/s13104-020-05081-7     |
| 23344547 | 10.1097/QAI.0b013e318287c1fe     | 27578823 | 10.1093/cid/ciw519            | 32469985 | 10.1371/journal.pone.0233693   |
| 23364513 | 10.1097/QAI.0b013e318288b39d     | 27596685 | 10.1016/j.ijid.2016.08.028    | 32589346 | 10.1002/jia2.25517             |
| 23418463 | 10.1371/journal.pone.0055824     | 27685986 | 10.1097/COH.0000000000000331  | 32589347 | 10.1002/jia2.25510             |
| 23418518 | 10.1371/journal.pone.0056088     | 27716730 | 10.1097/COH.0000000000000303  | 32589367 | 10.1002/jia2.25530             |
| 23437135 | 10.1371/journal.pone.0056446     | 27776039 | 10.1097/QAD.0000000000001307  | 32603374 | 10.1371/journal.pone.0235471   |
| 23457534 | 10.1371/journal.pone.0056248     | 27798628 | 10.1038/ng.3704               | 32640106 | 10.1002/jia2.25546             |
| 23460854 | 10.1371/journal.pone.0057422     | 28077521 | 10.1093/cid/ciw880            | 32718966 | 10.1128/AAC.00782-20           |
| 23462219 | 10.1097/QAD.0b013e328360a4e5     | 28092681 | 10.1038/ng.3767               | 32722897 | 10.1002/jia2.25580             |
| 23469035 | 10.1371/journal.pone.0057611     | 28102610 | 10.1111/tmi.12843             | 32762660 | 10.1186/s12913-020-05517-7     |
| 23472118 | 10.1371/journal.pone.0057907     | 28158504 | 10.1093/cid/cix122            | 32828836 | 10.1016/j.jclinepi.2020.08.012 |
| 23498041 | 10.7196/samj.6024                | 28192529 | 10.1371/journal.pone.0169762  | 32847906 | 10.1136/bmjopen-2019-036214    |
| 23505379 | 10.1371/journal.pgen.1003318     | 28234689 | 10.1097/QAI.0000000000001335  | 32853246 | 10.1371/journal.pone.0237772   |
| 23572010 | 10.1097/QAI.0b013e318293ae48     | 28296798 | 10.1097/QAD.0000000000001321  | 32868333 | 10.1128/AAC.00513-20           |
| 23575330 | 10.5588/ijtld.12.0811            | 28364561 | 10.7448/IAS.20.1.20933        | 32910063 | 10.1097/QAD.0000000000002683   |
| 23585736 | 10.1371/journal.pmed.1001418     | 28369607 | 10.1093/molbev/msx107         | 32971055 | 10.1016/S2214-109X(20)30279-5  |
| 23614996 | 10.1097/QAI.0b013e3182969cc1     | 28440019 | 10.1002/jic.30749             | 33034417 | 10.1002/jia2.25617             |
| 23633367 | 10.1002/14651858.CD009153.pub3   | 28482962 | 10.5588/ijtld.16.0843         | 33198721 | 10.1186/s12905-020-01121-3     |
| 23660577 | 10.1097/QAD.0b013e328362d887     | 28510998 | 10.1111/tmi.12896             | 33283916 | 10.1002/jia2.25644             |
| 23674929 | 10.1371/journal.pmed.1001441     | 28520616 | 10.1097/QAI.0000000000001453  | 33315863 | 10.1371/journal.pmed.1003397   |
| 23751258 | 10.1097/QAD.0b013e328363bf7f     | 28530036 | 10.7448/IAS.20.4.21520        | 33371015 | 10.1136/bmjopen-2020-037955    |
| 23755122 | 10.1371/journal.pone.0064392     | 28530037 | 10.7448/IAS.20.4.21668        |          |                                |
| 23774112 | 10.1016/j.jclinepi.2013.03.013   | 28530039 | 10.7448/IAS.20.4.21528        |          |                                |

**Table 2. Number of authorships by journal, in alphabetical order.**

| Journal                                 | No. of authorships | %     |
|-----------------------------------------|--------------------|-------|
| AIDS (London, England)                  | 329                | 9.62  |
| AIDS and behavior                       | 6                  | 0.18  |
| AIDS care                               | 17                 | 0.50  |
| American journal of epidemiology        | 23                 | 0.67  |
| Antimicrobial agents and chemotherapy   | 72                 | 2.10  |
| Antiviral therapy                       | 13                 | 0.38  |
| BMC Health Services Research            | 9                  | 0.26  |
| BMC cancer                              | 48                 | 1.40  |
| BMC infectious diseases                 | 65                 | 1.90  |
| BMC pediatrics                          | 5                  | 0.15  |
| BMC research notes                      | 28                 | 0.82  |
| BMC womens health                       | 6                  | 0.18  |
| BMJ open                                | 37                 | 1.08  |
| Bulletin of the World Health Organiza.. | 35                 | 1.02  |
| Clinical infectious diseases : an off.. | 156                | 4.56  |
| Current opinion in HIV and AIDS         | 21                 | 0.61  |
| Current opinion in infectious diseases  | 13                 | 0.38  |
| Drug safety                             | 15                 | 0.44  |
| Epidemics                               | 9                  | 0.26  |
| Epidemiology (Cambridge, Mass.)         | 31                 | 0.91  |
| Expert review of anti-infective therapy | 1                  | 0.03  |
| Expert review of molecular diagnostics  | 2                  | 0.06  |
| Future microbiology                     | 2                  | 0.06  |
| Global health action                    | 9                  | 0.26  |
| HIV medicine                            | 10                 | 0.29  |
| Hepatology                              | 5                  | 0.15  |
| International journal of cancer         | 83                 | 2.43  |
| International journal of epidemiology   | 80                 | 2.34  |
| International journal of infectious d.. | 14                 | 0.41  |
| Journal of acquired immune deficiency.. | 397                | 11.60 |
| Journal of clinical epidemiology        | 26                 | 0.76  |
| Journal of clinical microbiology        | 20                 | 0.58  |
| Journal of clinical virology : the of.. | 19                 | 0.56  |
| Journal of epidemiology and community.. | 10                 | 0.29  |
| Journal of the International AIDS Soc.. | 415                | 12.13 |
| Journal of the Pediatric Infectious D.. | 33                 | 0.96  |
| Journal of women's health (2002)        | 15                 | 0.44  |
| Lancet (London, England)                | 19                 | 0.56  |
| Molecular biology and evolution         | 15                 | 0.44  |
| Nature genetics                         | 139                | 4.06  |
| PLoS computational biology              | 8                  | 0.23  |
| PLoS genetic                            | 23                 | 0.67  |
| PLoS medicine                           | 219                | 6.40  |
| PLoS one                                | 323                | 9.44  |
| Pediatrics                              | 16                 | 0.47  |
| Sexually transmitted infections         | 16                 | 0.47  |
| South African medical journal = Suid-.. | 17                 | 0.50  |

|                                         |     |      |
|-----------------------------------------|-----|------|
| Statistics in medicine                  | 11  | 0.32 |
| Systematic reviews                      | 8   | 0.23 |
| The Cochrane database of systematic r.. | 11  | 0.32 |
| The Journal of infectious diseases      | 56  | 1.64 |
| The Lancet. Global health               | 15  | 0.44 |
| The Lancet. Infectious diseases         | 32  | 0.94 |
| The Pan African medical journal         | 8   | 0.23 |
| The Pediatric infectious disease jour.. | 133 | 3.89 |
| The international journal of tubercul.. | 68  | 1.99 |
| The Lancet. HIV                         | 46  | 1.34 |
| Tropical medicine & international hea.. | 159 | 4.65 |

-----

**Table 3. Time trends: interaction between year and gender.**

| <b>Comparison / Authorship position</b> | <b>Multivariable models: Interaction with year</b> |                |
|-----------------------------------------|----------------------------------------------------|----------------|
|                                         | <b>OR (95%CI)</b>                                  | <b>p-value</b> |
| <b>Year*Gender: Women vs Men</b>        |                                                    |                |
| 0 percentile (first)                    | 1.03 (0.93 - 1.14)                                 | 0.6            |
| 1–33 percentile                         | 1.08 (1.00 - 1.17)                                 | 0.05           |
| 34–66 percentile                        | 1                                                  |                |
| 67–99 percentile                        | 1.02 (0.95 - 1.10)                                 | 0.52           |
| 100 percentile (last)                   | 1.07 (0.97 - 1.19)                                 | 0.16           |

Results from generalized multinomial regression models (GMRM) with random intercept for authors. Multivariable models adjusted for gender and income level of the country of affiliation, and additionally including an interaction between year and gender (model 1) or year and affiliation (model 2).

**Table 4. Characteristics of authors and authorships of 157 (regional, original research) articles published by the International epidemiology Databases to Evaluate AIDS (IeDEA) in Southern Africa, 2007 to 2020.**

|                               | <b>Authors<sup>#</sup><br/>N (%)</b> | <b>Authorships<br/>N (%)</b> | <b>No. of articles<br/>/author<br/>Mean (SD)</b> | <b>First<br/>authorships<br/>N (%)</b> | <b>Last<br/>authorships<br/>N (%)</b> | <b>First and/or last<br/>authorships<br/>N (%)</b> |
|-------------------------------|--------------------------------------|------------------------------|--------------------------------------------------|----------------------------------------|---------------------------------------|----------------------------------------------------|
| <b>Total</b>                  | 461                                  | 1535                         | 3.3 (7.1)                                        | 157                                    | 157                                   | 157                                                |
| <b>Gender</b>                 |                                      |                              |                                                  |                                        |                                       |                                                    |
| <b>Women</b>                  | 239 (51.8%)                          | 630 (41.0%)                  | 2.6 (5.4)                                        | 84 (53.5%)                             | 59 (37.6%)                            | 109 (69.4%)                                        |
| <b>Men</b>                    | 222 (48.2%)                          | 905 (59.0%)                  | 4.1 (8.4)                                        | 73 (46.5%)                             | 98 (62.4%)                            | 123 (78.3%)                                        |
| <b>Country of affiliation</b> |                                      |                              |                                                  |                                        |                                       |                                                    |
| <b>High income</b>            | 174 (37.7%)                          | 486 (31.7%)                  | 3.4 (8.3)                                        | 67 (42.7%)                             | 72 (45.9%)                            | 95 (60.5%)                                         |
| <b>Women</b>                  | 87 (50.0%)                           | 188 (38.7%)                  | 2.3 (5.1)                                        | 36 (53.7%)                             | 36 (50.0%)                            | 59 (62.1%)                                         |
| <b>Men</b>                    | 87 (50.0%)                           | 298 (61.3%)                  | 4.6 (10)                                         | 31 (46.3%)                             | 36 (50.0%)                            | 56 (58.9%)                                         |
| <b>Upper-middle income</b>    | 184 (39.9%)                          | 799 (52.1%)                  | 3.9 (7.4)                                        | 67 (42.7%)                             | 79 (50.3%)                            | 89 (56.7%)                                         |
| <b>Women</b>                  | 116 (63.0%)                          | 385 (48.2%)                  | 3.3 (6.3)                                        | 44 (65.7%)                             | 23 (29.1%)                            | 56 (62.9%)                                         |
| <b>Men</b>                    | 68 (37.0%)                           | 414 (51.8%)                  | 4.9 (9.0)                                        | 23 (34.3%)                             | 56 (70.9%)                            | 66 (74.2%)                                         |
| <b>Lower income</b>           | 103 (22.3%)                          | 250 (16.3%)                  | 2.2 (2.9)                                        | 23 (14.6%)                             | 6 (3.8%)                              | 24 (15.3%)                                         |
| <b>Women</b>                  | 36 (35.0%)                           | 57 (22.8%)                   | 1.3 (0.8)                                        | 4 (17.4%)                              | 0 (0%)                                | 4 (16.7%)                                          |
| <b>Men</b>                    | 67 (65.0%)                           | 193 (77.2%)                  | 2.7 (3.5)                                        | 19 (82.6%)                             | 6 (100%)                              | 23 (95.8%)                                         |

Lower income includes World Bank lower-middle income countries and low-income countries.

For authors who listed multiple affiliations, we defined the main affiliation as the place where the author spent most of their time when the article was published.

The percentage of Women/Men within an affiliation income category were calculated from total in the corresponding income category.

**Table 5. Associations of gender and country of affiliation with authorship position on 157 (regional, original research) articles published by the International epidemiology Databases to Evaluate AIDS (IeDEA) in Southern Africa, 2007 to 2020.**

| <i>Comparison / Authorship position</i> | <i>Univariable models</i> |                | <i>Multivariable model</i> |                |
|-----------------------------------------|---------------------------|----------------|----------------------------|----------------|
|                                         | <i>OR (95%CI)</i>         | <i>p-value</i> | <i>OR (95%CI)</i>          | <i>p-value</i> |
| <b>Gender: Women vs Men</b>             |                           |                |                            |                |
| 0 percentile (first)                    | 1.98 (0.98 – 4.00)        | 0.06           | 2.05 (0.99 - 4.24)         | 0.05           |
| 1–33                                    | 1.13 (0.64 - 1.96)        | 0.68           | 1.12 (0.57 - 2.21)         | 0.75           |
| 34–66                                   | 1                         |                | 1                          |                |
| 67–99                                   | 0.84 (0.49 - 1.46)        | 0.54           | 0.82 (0.45 - 1.49)         | 0.52           |
| 100 percentile (last)                   | 0.69 (0.37 - 1.30)        | 0.25           | 0.62 (0.31 - 1.23)         | 0.17           |
| <b>Country of affiliation</b>           |                           |                |                            |                |
| <b>Lower vs high income</b>             |                           |                |                            |                |
| 0 percentile (first)                    | 0.31 (0.12 - 0.79)        | 0.01           | 0.36 (0.14 - 0.93)         | 0.03           |
| 1–33                                    | 0.92 (0.40 - 2.10)        | 0.85           | 0.95 (0.41 - 2.22)         | 0.91           |
| 34–66                                   | 1                         |                | 1                          |                |
| 67–99                                   | 0.60 (0.29 - 1.24)        | 0.17           | 0.60 (0.28 - 1.27)         | 0.18           |
| 100 percentile (last)                   | 0.15 (0.04 - 0.54)        | <0.001         | 0.14 (0.04 - 0.54)         | <0.001         |
| <b>Upper-middle vs high income</b>      |                           |                |                            |                |
| 0 percentile (first)                    | 0.39 (0.18 - 0.83)        | 0.01           | 0.36 (0.17 - 0.79)         | 0.01           |
| 1–33                                    | 1.06 (0.52 - 2.14)        | 0.87           | 1.07 (0.52 - 2.20)         | 0.86           |
| 34–66                                   | 1                         |                | 1                          |                |
| 67–99                                   | 0.71 (0.38 - 1.33)        | 0.29           | 0.74 (0.39 - 1.42)         | 0.37           |
| 100 percentile (last)                   | 0.51 (0.26 - 0.99)        | 0.05           | 0.53 (0.27 - 1.06)         | 0.07           |

Results from generalized multinomial regression model (GMRM) with random intercept for authors. Multivariable model is adjusted for gender and income level of the country of affiliation. Lower income includes World Bank lower-middle income countries and low-income countries.

**Figure 1. Proportion of Women authorships across the range of standardised authorship positions, with a weighted linear regression line (upper panel) and proportion of authorships by country income level with weighted cubic splines (lower panel).**

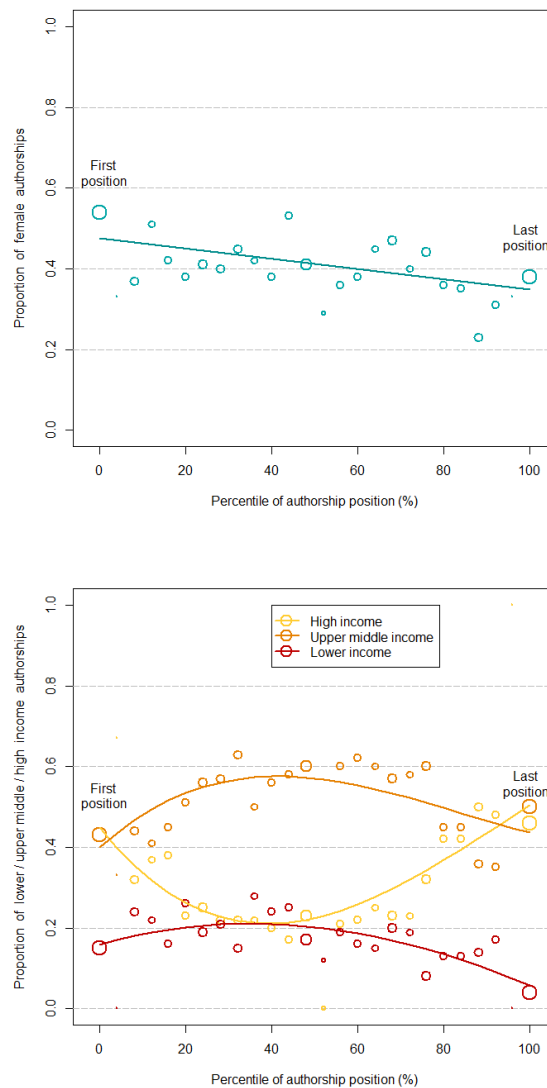

Based on 157 (regional, original research) articles published by the International epidemiology Databases to Evaluate AIDS (IeDEA) in Southern Africa, 2007 to 2020. Lower income includes World Bank lower-middle income countries and low-income countries. The size of the circles is proportional to the number of authorships in each position.



**Table 6. Characteristics of authors and authorships of 95 multiregional, original research articles including the International epidemiology Databases to Evaluate AIDS (IeDEA), 2007 to 2020, with participation of the Southern African region.**

|                               | <b>Authors<sup>#</sup><br/>N (%)</b> | <b>Authorships<br/>N (%)</b> | <b>No. of articles<br/>/author<br/>Mean (SD)</b> | <b>First<br/>authorships<br/>N (%)</b> | <b>Last<br/>authorships<br/>N (%)</b> | <b>First and/or last<br/>authorships<br/>N (%)</b> |
|-------------------------------|--------------------------------------|------------------------------|--------------------------------------------------|----------------------------------------|---------------------------------------|----------------------------------------------------|
| <b>Total</b>                  | 613                                  | 1484                         | 2.4 (3.9)                                        | 95                                     | 95                                    | 95                                                 |
| <b>Gender</b>                 |                                      |                              |                                                  |                                        |                                       |                                                    |
| <b>Women</b>                  | 306 (49.9%)                          | 666 (44.9%)                  | 2.2 (3.1)                                        | 58 (61.1%)                             | 22 (23.2%)                            | 67 (70.5%)                                         |
| <b>Men</b>                    | 307 (50.1%)                          | 818 (55.1%)                  | 2.7 (4.6)                                        | 37 (38.9%)                             | 73 (76.8%)                            | 82 (86.3%)                                         |
| <b>Country of affiliation</b> |                                      |                              |                                                  |                                        |                                       |                                                    |
| <b>High income</b>            | 357 (58.2%)                          | 889 (59.9%)                  | 2.7 (4.6)                                        | 81 (85.3%)                             | 79 (83.2%)                            | 88 (92.6%)                                         |
| <b>Women</b>                  | 177 (49.6%)                          | 414 (46.6%)                  | 2.4 (3.3)                                        | 53 (65.4%)                             | 14 (17.7%)                            | 59 (67.0%)                                         |
| <b>Men</b>                    | 180 (50.4%)                          | 475 (53.4%)                  | 2.9 (5.6)                                        | 28 (34.6%)                             | 65 (82.3%)                            | 72 (81.8%)                                         |
| <b>Upper-middle income</b>    | 119 (19.4%)                          | 310 (20.9%)                  | 2.4 (3.6)                                        | 11 (11.6%)                             | 13 (13.7%)                            | 17 (17.9%)                                         |
| <b>Women</b>                  | 73 (61.3%)                           | 152 (49%)                    | 2.0 (3.6)                                        | 5 (45.5%)                              | 7 (53.8%)                             | 10 (58.8%)                                         |
| <b>Men</b>                    | 46 (38.7%)                           | 158 (51%)                    | 2.9 (3.6)                                        | 6 (54.5%)                              | 6 (46.2%)                             | 12 (70.6%)                                         |
| <b>Lower income</b>           | 137 (22.3%)                          | 285 (19.2%)                  | 1.8 (1.5)                                        | 3 (3.2%)                               | 3 (3.2%)                              | 6 (6.3%)                                           |
| <b>Women</b>                  | 56 (40.9%)                           | 100 (35.1%)                  | 1.6 (1.0)                                        | 0 (0%)                                 | 1 (33.3%)                             | 1 (16.7%)                                          |
| <b>Men</b>                    | 81 (59.1%)                           | 185 (64.9%)                  | 2 (1.8)                                          | 3 (100%)                               | 2 (66.7%)                             | 5 (83.3%)                                          |

Lower income includes World Bank lower-middle income countries and low-income countries.

For authors who listed multiple affiliations, we defined the main affiliation as the place where the author spent most of their time when the article was published.

The percentage of Women/Men within an affiliation income category were calculated from total in the corresponding income category.

**Table 7. Associations of gender and country of affiliation with authorship position on 95 multiregional, original research articles including the International epidemiology Databases to Evaluate AIDS (IeDEA), 2007 to 2020, with participation of the Southern African region.**

| <i>Comparison / Authorship position</i>   | <i>Univariable models</i> |                | <i>Multivariable model</i> |                |
|-------------------------------------------|---------------------------|----------------|----------------------------|----------------|
|                                           | <i>OR (95%CI)</i>         | <i>p-value</i> | <i>OR (95%CI)</i>          | <i>p-value</i> |
| <b><i>Gender: Women vs Men</i></b>        |                           |                |                            |                |
| 0 percentile (first)                      | 2.08 (1.06 - 4.08)        | 0.03           | 1.97 (1.00 - 3.90)         | 0.05           |
| 1–33                                      | 1.12 (0.63 - 1.99)        | 0.71           | 1.13 (0.73 - 1.74)         | 0.59           |
| 34–66                                     | 1                         |                | 1                          |                |
| 67–99                                     | 1.05 (0.62 - 1.75)        | 0.87           | 1.02 (0.67 - 1.58)         | 0.91           |
| 100 percentile (last)                     | 0.52 (0.27 - 1.0)         | 0.05           | 0.49 (0.23 - 1.08)         | 0.08           |
| <b><i>Country of affiliation</i></b>      |                           |                |                            |                |
| <b><i>Lower vs high income</i></b>        |                           |                |                            |                |
| 0 percentile (first)                      | 0.06 (0.02 - 0.24)        | <0.001         | 0.07 (0.02 - 0.27)         | <0.001         |
| 1–33                                      | 0.45 (0.23 - 0.87)        | 0.02           | 0.46 (0.28 - 0.76)         | <0.001         |
| 34–66                                     | 1                         |                | 1                          |                |
| 67–99                                     | 0.51 (0.29 - 0.90)        | 0.02           | 0.51 (0.31 - 0.84)         | 0.01           |
| 100 percentile (last)                     | 0.11 (0.03 - 0.39)        | <0.001         | 0.11 (0.03 - 0.39)         | <0.001         |
| <b><i>Upper-middle vs high income</i></b> |                           |                |                            |                |
| 0 percentile (first)                      | 0.19 (0.07 - 0.50)        | <0.001         | 0.17 (0.07 - 0.44)         | <0.001         |
| 1–33                                      | 0.42 (0.19 - 0.90)        | 0.03           | 0.42 (0.24 - 0.72)         | <0.001         |
| 34–66                                     | 1                         |                | 1                          |                |
| 67–99                                     | 0.70 (0.37 - 1.32)        | 0.27           | 0.67 (0.39 - 1.14)         | 0.14           |
| 100 percentile (last)                     | 0.34 (0.15 - 0.81)        | 0.01           | 0.29 (0.11 - 0.80)         | 0.02           |

Results from generalized multinomial regression model (GMRM) with random intercept for authors. Multivariable model is adjusted for gender and income level of the country of affiliation. Lower income includes World Bank lower-middle income countries and low-income countries.

**Figure 2. Proportion of Women authorships across the range of standardised authorship position, with a weighted linear regression line (upper panel) and proportion of authorships by country income level with weighted cubic splines (lower panel).**

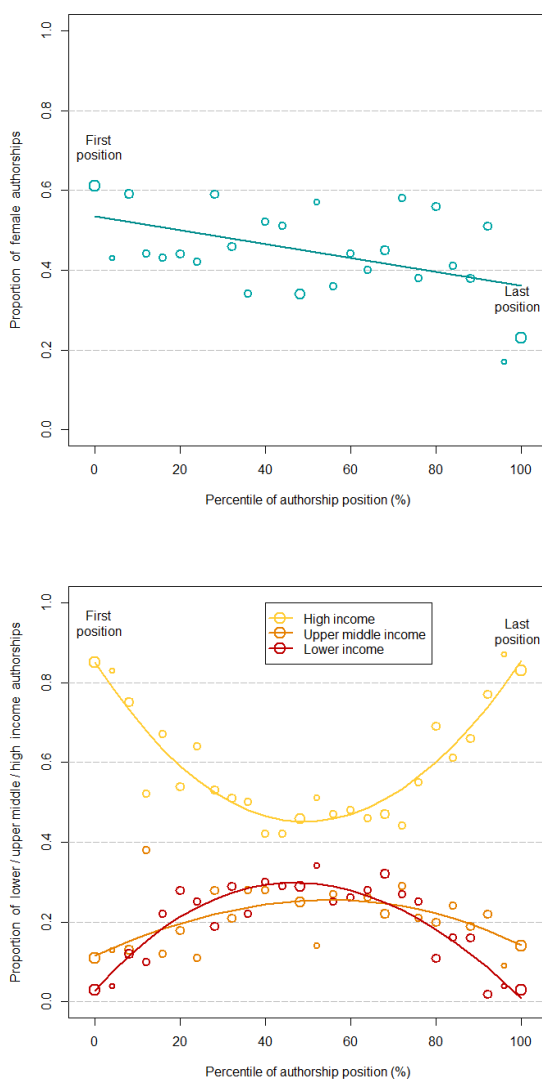

Based on 95 (multiregional, original research) articles including the International epidemiology Databases to Evaluate AIDS (IeDEA) in Southern Africa, 2007 to 2020. Lower income includes World Bank lower-middle income countries and low-income countries. The size of the circles is proportional to the number of authorships in each position.

**Table 8. Characteristics of authors and authorships of 61 other publications (methods papers, commentaries, systematic reviews) acknowledging the grant of the International epidemiology Databases to Evaluate AIDS (IeDEA) in Southern Africa, 2007 to 2020.**

|                               | <b>Authors<sup>#</sup><br/>N (%)</b> | <b>Authorships<br/>N (%)</b> | <b>No. of articles<br/>/author<br/>Mean (SD)</b> | <b>First<br/>authorships<br/>N (%)</b> | <b>Last<br/>authorships<br/>N (%)</b> | <b>First and/or last<br/>authorships<br/>N (%)</b> |
|-------------------------------|--------------------------------------|------------------------------|--------------------------------------------------|----------------------------------------|---------------------------------------|----------------------------------------------------|
| <b>Total</b>                  | 206                                  | 402                          | 2 (2.8)                                          | 61                                     | 59*                                   | 61                                                 |
| <b>Gender</b>                 |                                      |                              |                                                  |                                        |                                       |                                                    |
| <b>Women</b>                  | 108 (52.4%)                          | 184 (45.8%)                  | 1.7 (2.0)                                        | 31 (50.8%)                             | 23 (39%)                              | 37 (60.7%)                                         |
| <b>Men</b>                    | 98 (47.6%)                           | 218 (54.2%)                  | 2.2 (3.5)                                        | 30 (49.2%)                             | 36 (61%)                              | 43 (70.5%)                                         |
| <b>Country of affiliation</b> |                                      |                              |                                                  |                                        |                                       |                                                    |
| <b>High income</b>            | 151 (73.3%)                          | 304 (75.6%)                  | 2.1 (3.2)                                        | 36 (59%)                               | 39 (66.1%)                            | 45 (73.8%)                                         |
| <i>Women</i>                  | 77 (51%)                             | 129 (42.4%)                  | 1.9 (2.3)                                        | 15 (41.7%)                             | 17 (43.6%)                            | 23 (51.1%)                                         |
| <i>Men</i>                    | 74 (49%)                             | 175 (57.6%)                  | 2.4 (3.9)                                        | 21 (58.3%)                             | 22 (56.4%)                            | 29 (64.4%)                                         |
| <b>Upper-middle income</b>    | 36 (17.5%)                           | 78 (19.4%)                   | 1.7 (1.6)                                        | 22 (36.1%)                             | 20 (33.9%)                            | 27 (44.3%)                                         |
| <i>Women</i>                  | 24 (66.7%)                           | 48 (61.5%)                   | 1.3 (1.2)                                        | 14 (63.6%)                             | 6 (30.0%)                             | 17 (63.0%)                                         |
| <i>Men</i>                    | 12 (33.3%)                           | 30 (38.5%)                   | 2.4 (2.1)                                        | 8 (36.4%)                              | 14 (70.0%)                            | 15 (55.6%)                                         |
| <b>Lower income</b>           | 19 (9.2%)                            | 20 (5.0%)                    | 1.1 (0.2)                                        | 3 (4.9%)                               | 0 (0%)                                | 3 (4.9%)                                           |
| <i>Women</i>                  | 7 (36.8%)                            | 7 (35.0%)                    | 1.0 (0.0)                                        | 2 (66.7%)                              | 0 (0%)                                | 2 (66.7%)                                          |
| <i>Men</i>                    | 12 (63.2%)                           | 13 (65.0%)                   | 1.1 (0.3)                                        | 1 (33.3%)                              | 0 (0%)                                | 1 (33.3%)                                          |

\* Authorships from two single-author publications were treated as first authorships.

Lower-income includes World Bank lower-middle income countries and low-income countries.

For authors who listed multiple affiliations, we defined the main affiliation as the place where the author spent most of their time when the article was published.

The percentage of Women/Men within an affiliation income category were calculated from total in the corresponding income category.

**Table 9. Associations of gender and country of affiliation with authorship position on 61 other publications (methods papers, commentaries, systematic reviews) acknowledging the grant of the International epidemiology Databases to Evaluate AIDS (IeDEA) in Southern Africa, 2007 to 2020.**

| <i>Comparison / Authorship position</i>   | <i>Univariable models</i> |                | <i>Multivariable model</i> |                |
|-------------------------------------------|---------------------------|----------------|----------------------------|----------------|
|                                           | <i>OR (95%CI)</i>         | <i>p-value</i> | <i>OR (95%CI)</i>          | <i>p-value</i> |
| <b><i>Gender: Women vs Men</i></b>        |                           |                |                            |                |
| 0 percentile (first)                      | 1.26 (0.43 - 3.70)        | 0.67           | 1.22 (0.40 - 3.74)         | 0.73           |
| 1–33                                      | 1.65 (0.61 - 4.49)        | 0.33           | 1.72 (0.62 - 4.75)         | 0.29           |
| 34–66                                     | 1                         |                | 1                          |                |
| 67–99                                     | 1.31 (0.52 - 3.34)        | 0.57           | 1.40 (0.54 - 3.65)         | 0.49           |
| 100 percentile (last)                     | 0.97 (0.38 - 2.46)        | 0.95           | 0.89 (0.35 - 2.28)         | 0.82           |
| <b><i>Country of affiliation</i></b>      |                           |                |                            |                |
| <b><i>Lower vs high income</i></b>        |                           |                |                            |                |
| 0 percentile (first)                      | 1.88 (0.23 - 15.6)        | 0.56           | 1.94 (0.24 - 15.8)         | 0.53           |
| 1–33                                      | 1.09 (0.16 - 7.59)        | 0.93           | 1.18 (0.17 - 8.22)         | 0.87           |
| 34–66                                     | 1                         |                | 1                          |                |
| 67–99                                     | 1.80 (0.31 - 10.3)        | 0.51           | 1.90 (0.33 - 10.8)         | 0.47           |
| 100 percentile (last)                     | 0.00 (NA)                 | 1.00           | 0.00 (NA)                  | 1.00           |
| <b><i>Upper-middle vs high income</i></b> |                           |                |                            |                |
| 0 percentile (first)                      | 3.45 (0.90 - 13.2)        | 0.07           | 3.35 (0.87 - 12.9)         | 0.08           |
| 1–33                                      | 0.77 (0.19 - 3.11)        | 0.72           | 0.70 (0.17 - 2.87)         | 0.62           |
| 34–66                                     | 1                         |                | 1                          |                |
| 67–99                                     | 0.92 (0.25 - 3.32)        | 0.90           | 0.88 (0.24 - 3.18)         | 0.84           |
| 100 percentile (last)                     | 3.68 (1.25 - 10.8)        | 0.02           | 3.72 (1.26 - 11.0)         | 0.02           |

Results from generalized multinomial regression model (GMRM) with random intercept for authors. Multivariable model is adjusted for gender and income level of the country of affiliation. Lower income includes World Bank lower-middle income countries and low-income countries.

**Figure 3. Proportion of Women authorships across the range of standardised authorship position, with a weighted linear regression line (upper panel) and proportion of authorships by country income level with weighted cubic splines (lower panel).**

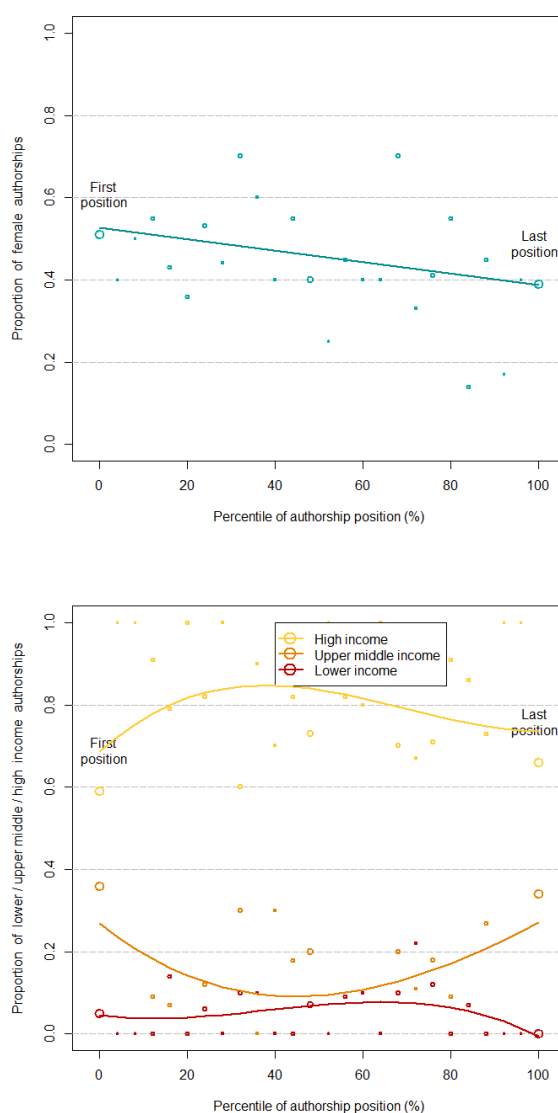

Based on 61 other publications (methods papers, commentaries, systematic reviews) acknowledging the grant of the International epidemiology Databases to Evaluate AIDS (IeDEA) in Southern Africa, 2007 to 2020. Lower income includes World Bank lower-middle income countries and low-income countries. The size of the circles is proportional to the number of authorships in each position.
